# Supplementary material
Source: publisher site journal article supplement (https://www.dovepress.com/article/364241)
Supplement: Supplementary file 1 [file get_supplementary_file.php]

Pneumonia Caused by Coinfection with Cytomegalovirus and

*Pneumocystis jirovecii* in an HIV-negative Infant Diagnosed by Metagenomic Next-Generation Sequencing

Jingwen Lyu1,2†, Qianyun Deng2†, Rongqing Li3, Benshun Tian1,2, Yunhu Zhao2, Xuejiao Hu2, Maohua Zhou2*, Bing Gu2*

1. Xuzhou Key Laboratory of Laboratory Diagnostics, School of Medical Technology, Xuzhou 221004, China

2. Laboratory Medicine, Guangdong Provincial People's Hospital, Guangdong Academy of Medical Sciences, Guangzhou, 510000, China

3. Jiangsu Province Key Laboratory of Immunity and Metabolism, Xuzhou Medical University, Xuzhou 221004, China

*Co-Corresponding authors:Maohua Zhou Ph.D. and Bing Gu Ph.D.Laboratory Medicine, Guangdong Provincial People's Hospital.106 Zhongshan 2nd Rd, Yuexiu District, Guangzhou, Guangdong 510000, China.

Email: zhoumaohua@gdph.org.cn(Maohua Zhou), [gb20031129@163.com](mailto:gb20031129@163.com)(Bing Gu) Tel: 0086-020-83827812-62462.

†: These authors have contributed equally to this work and share the first authorship.

**Supplementary Table S1.**

Reports of PCP and CMV cases detected by next-generation sequencing (NGS).

| Patient  ID | Clinical  diagnosis | Smear and  Culture  results | β-D -  glucan  assays  (pg/ml) | Other laboratory-based diagnostic testing results | Sample  types for  NGS test | NGS-based diagnosis  (number of unique  reads) | Reference |
| --- | --- | --- | --- | --- | --- | --- | --- |
| 1 | AIDS ;  Pulmonary  infection | Negative | 251.64 | GM test(Negative)  Xpert MTB(Negative)  GMS(Negative ) | BALF | *P. jirovecii*（1000078）CMV（4192）*Staphylococcus epidermidis* （130）*Prevotella melaninogenica*（65）*Streptococcus sanguis* (15) *Streptococcus mitis* （3）*Cutiibacterium acnes*（7）*Rothia mucilaginosa*（10）*Veillonella atypical*（4）*Moraxella osloensis*（5） | 18 |
| 2 | urinary tract infection;  acute renal failure;  RT;  Severe ARDS | Urine culture: [Enterococcus](http://www.dbpia.co.kr/journal/articleDetail?nodeId=NODE08919143)  faecium  BALF culture: Acinetobacter baumannii and Klebsiella  pneumoniae  Blood culture: Klebsiella  pneumoniae | 280.2  206  1090.1  1215.7  529.1  147.7  115.2 | - | Blood | *P. jirovecii* (48)  CMV (74) | 16 |
| 3 | renal insufficiency;  RT;  Severe ARDS | Negative | 85.6  481.8  856.4  1217  2019  1477.9  412  155.4 | - | Blood | Blood 1: *P. jirovecii* (55)  CMV (37) TTV (10)  Blood 2: *P. jirovecii* (260)  CMV (4)  Blood 3: *P. jirovecii* (33)  CMV (91)  Blood 4: *P. jirovecii* (8)  CMV (144)TTV(78)  Blood 5: CMV (149) | 16 |
| 4 | Renal insufficiency; RT;  Pneumonia | Negative | 345  812.6  99.3 | - | Blood | *P. jirovecii* (128) CMV (90) | 16 |
| 5 | RT;  Severe ARDS | Blood and urine cultures:  Negative  Sputum culture: Acinetobacter baumannii | 345  812.6  99.3 | - | Blood | Blood 1: *P. jirovecii* (66) CMV (10) TTV (167)  Blood 2: *P. jirovecii* (1087) Human polyomavirus 8 (21) | 16 |
| 6 | Immunological anemia;  Pulmonary Infection Type I respiratory failure | Negative | - | GM(Negative)  Xpert MTB(Negative) | BALF | *P. jirovecii* (28)  CMV(72) | 19 |
| 7 | AML; pulmonary infection | Negative | - | GM(Negative)  Xpert MTB(Negative) | BALF | CMV(10)  *P. jirovecii* (50916) | 19 |
| 8 | Autoimmune hemolytic anemia; pulmonary infection | Smear Results (Gram-negative bacilli)  Culture Resul-ts(Negative) | - | GM(Negative)  Xpert MTB(Negative) | BALF | CMV(23282)  *P. jirovecii* (64)  *Rhizopus microsporus*(6) | 19 |
| 9 | ALL; pulmonary infection | Negative | - | GM(Negative)  Xpert MTB(Negative) | BALF | CMV(154)  *P. jirovecii* (1058) | 19 |
| 10 | Lymphoma; pulmonary infection | Smear Results (Gram-positive cocci,  Gram-negative bacilli)  Culture Resul-ts (*Staphylococcus epidermidis*) | - | GM(Negative)  Xpert MTB(Negative) | BALF | CMV (1626)  *P. jirovecii* (303572) | 19 |
| 11 | pulmonary infection | Smear Results (Gram-positive cocci)  Culture Results(*Acinetobacter baumannii ,*  *Pneumocystis jirovecii*) | - | GM(Negative)  Xpert MTB(Negative) | BALF | CMV(4)  *P. jirovecii* (4522)  *Aspergillus fumigatus*(6)  *Acinetobacter baumannii*  (338) | 19 |
| 12 | pulmonary infection | Smear Results(Negative )  Culture Results(*Pneumocystis jirovecii)* | - | GM(positive)  Xpert MTB(Negative) | BALF | *P. jirovecii* (104054)  CMV (29) | 19 |
| 13 | Lymphoma; pulmonary infection | Smear Results(Negative)  Culture Resul-ts(*Pneumocystis jirovecii)* | - | GM (positive)  Xpert MTB(Negative) | BALF | *P. jirovecii* (86)*,*  CMV (4) | 19 |
| 14 | Lymphoma; pulmonary infection | Blood culture:*Staphylococcus aureus*  Sputum Wright-Giemsa stained smear: fungi  Sputum cultur-e: *Candida* | < 31.25 | - | Blood | *P. jirovecii* (427)  *Staphylococcus aureus* (2)  CMV (652)  *Candida albicans* (2) | 20 |
| 15 | Breast cancer;  Liver cirrhosis; Diabetes;Renal insufficiency; Cardiac insufficiency; pulmonary infection | Blood smear and sputum Wright-Giemsa stained smear(Negative) ;  Blood and sputum culture(Negative) | < 31.25 | - | Blood | *P. jirovecii* (5)  *Candida tropicalis* (3791)  CMV (38)  *Aspergillus fumigatus* (3) | 20 |
| 16 | Lymphoma; pulmonary infection | Blood smear and sputum HE  stained smear(Negative);  Blood and sputum culture(Negative) | < 31.25 | - | Blood | *P. jirovecii* (5)  CMV (28) | 20 |
| 17 | Pemphigus;  Thymoma;  pulmonary infection | BALF and sputum Wright-Giemsa stained smear:(Negative);  BALF and sputum culture:(Negative) | < 31.25 | - | BALF | *P. jirovecii* (9)  CMV (187)  Nocardia cyriacigeorgica (42) | 20 |
| 18 | Lymphoma; pulmonary infection | BALF and sputum HE stained smear: negative;  BALF and sputum culture: negative | < 31.25 | - | BALF | *P. jirovecii* (34)  CMV (7) | 20 |
| 19 | ARDS | Negative | <3.836 | GM(-)  Xpert MTB(-) | BALF and  Blood | BALF:*Mycobacteria abscessus* (1315) *P. jirovecii* (44) CMV (649)  Blood: *Mycobacteria abscessus* (0) *P. jirovecii* (368) CMV (44) | 21 |
| 20 | X-linked hyper IgM syndrome;  Severe pneumonia | - | 265.5 | - | Deep sputum secretions | The first hospital admission:  *Streptococcus parasanguinis*（22）*Streptococcus mitis*（9）*Rothia mucilaginosa*（31）Cytomegalovirus（77）  *Pneumocystis jirovecii*（11564）  The second hospital admission:  *Haemophilus influenzae*（1398）  *Rothia aeria*（638）*Streptococcus Pneumoniae*（344）*Streptococcus*  *pseudopneumoniae*（84）*Peptoniphilus lacrimalis*（47）  *Staphylococcus aureus*（5）  CMV（5444）  *P. jirovecii*（2793） | 22 |

AIDS: Acquired immune deficiency syndrome; RT: renal transplant; ARDS: acute respiratory distress syndrome; AML: acute myeloid leukemia;ALL: acute lymphocytic leukemia; GM test: galactomannan test; GMS: Gomori-Grocott methenamine silver nitrate staining; Xpert MTB: GeneXpert MTB/RIF;CMV: *Cytomegalovirus*; *P. jirovecii*: *Pneumocystis jiroveci*;TTV: Torque teno virus.

**Supplementary Table S2.**

| Patient  ID | Patient | Clinical  diagnosis | Smear and  Culture  results | Sample  types for  NGS test | NGS-based diagnosis  (number of unique reads) | Reference |
| --- | --- | --- | --- | --- | --- | --- |
| 1 | 2-year-old girl | Acute laryngitis, degree II laryngeal  Obstruction; Pneumonia | Sputum bacterial culture was negative | BALF | *Mycoplasma pneumoniae*（1357）  Bocavirus 1（56） | 24 |
| 2 | 7-year-old girl | Diopathic pulmonary hemosiderosis | Multiple blood cultures was negative | BALF | *Nocardia abscessus*（96% match） | 25 |
| 3 | 5-year-old boy | Botrytis plastic Bronchitis Type I | Blood culture and sputum culture were negative | BALF | Botrytis cinerea (-) | 26 |
| 4 | 7-month-old boy | Cough and fever with a papular rash | *Talaromyces marneffei*  produced in bone marrow and blood cultures | Plasma | The distribution of bacterial sequences (N = 529 reads,100%):  *Talaromyces marneffei* (248;47%)  *Cutibacterium* (74,14%)  *Acinetobacter* (64,12%)  *Staphylococcus* (64，12%)  *Acidovorax* (31,6%) *Corynebacterium* (16,3%)  *Malassezia* (32,6%) | 27 |
| 5 | 10-week-old girl | Severe pneumonia | Blood and sputum secretions  were negative | Blood | *Penicillium chrysogenum* (404)  *Pichia anomala* (134) *Candida parapsilosis* (6) | 28 |
| 6 | 14-year-old girl | Diabetes;  Invasive pulmonary | Hexamine silver staining on the BALF was positive | BALF | *Aspergillus fumigatus* (8833, cover rate 0.038%)  *Pneumocystis jirovecii* (109593, cover rate 0.48%) | 29 |
| 7 | 5 months old boy | X-linked hyper IgM (XHIGM) syndrome;  Severe pneumonia | - | Deep sputum secretions | The first hospital admission:  *Streptococcus parasanguinis*（22）*Streptococcus mitis*（9）*Rothia mucilaginosa*（31）Cytomegalovirus（77）  *Pneumocystis jirovecii*（11564）  The second hospital admission:  *Haemophilus influenzae*（1398）  *Rothia aeria*（638）*Streptococcus Pneumoniae*（344）*Streptococcus*  *pseudopneumoniae*（84）*Peptoniphilus lacrimalis*（47）  *Staphylococcus aureus*（5）  Cytomegalovirus（5444）  *Pneumocystis jirovecii*（2793） | 22 |
